# Supplementary material for: Acupuncture Regulating Gut Microbiota in Abdominal Obese Rats Induced by High-Fat Diet
Source: Evid Based Complement Alternat Med. 2019 Jun 2;2019:4958294. doi: 10.1155/2019/4958294 (PMC6582896; doi:10.1155/2019/4958294)
Supplement: Supplementary Materials — (1) LEfSe analysis of each group. (2) Data of principal coordinates analysis (Pcoa) in each sample at the OTU level. (3) Eigen values of Pcoa from PC1-PC21. (4) Statistical data of each group at the genus level. (5) Statistical data of each group at the phylum level. [file 4958294.f1.zip › 4958294.f1/high quality Sequence Information Table.xls]

## Sheet: 有效序列信息
Amplified Region	Samples	Sequences	Bases(bp)	Average Length
-	21	941816	413258874	438.789
