# Supplementary material for: Acupuncture Regulating Gut Microbiota in Abdominal Obese Rats Induced by High-Fat Diet
Source: Evid Based Complement Alternat Med. 2019 Jun 2;2019:4958294. doi: 10.1155/2019/4958294 (PMC6582896; doi:10.1155/2019/4958294)
Supplement: Supplementary Materials — (1) LEfSe analysis of each group. (2) Data of principal coordinates analysis (Pcoa) in each sample at the OTU level. (3) Eigen values of Pcoa from PC1-PC21. (4) Statistical data of each group at the genus level. (5) Statistical data of each group at the phylum level. [file 4958294.f1.zip › 4958294.f1/rareficationCurve Table ace.xls]

## Sheet: 稀释性曲线表
num sample rows	Acu_2	Acu_7	Acu_1	Acu_3	Acu_4	Acu_5	Acu_6	HFD_4	HFD_3	HFD_5	HFD_6	HFD_2	HFD_7	HFD_1	NCD_1	NCD_5	NCD_2	NCD_6	NCD_3	NCD_7	NCD_4
1	0	0	0	0	0	0	0	0	0	0	0	0	0	0	0	0	0	0	0	0	0
300	183.277	204.187	195.778	198.855	194.12	150.449	161.627	231.998	147.809	232.57	205.782	199.885	234.312	221.511	224.469	148.875	234.344	169.4	184.498	219.338	192.375
600	225.371	284.343	186.34	249.09	232.308	210.846	205.991	265.129	183.173	283.684	232.897	230.064	261.055	242.771	203.156	207.416	318.409	195.932	205.644	235.074	200.828
900	232.533	301.55	220.266	258.531	248.698	230.174	243.566	295.933	173.568	290.573	235.67	251.866	277.586	247.093	173.483	243.221	292.91	205.892	226.455	245.056	204.425
1200	240.11	314.033	231.813	266.485	269.726	248.946	265.077	318.649	173.714	310.069	239.862	263.915	296.289	258.242	186.659	265.393	271.377	226.131	240.878	248.537	226.788
1500	256.053	310.853	238.536	267.883	274.942	254.627	277.146	329.85	182.511	323.459	253.375	263.74	305.245	274.979	200.776	276.673	256.405	243.663	252.177	257.114	237.068
1800	272.801	318.94	244.312	267.113	279.693	262.124	280.787	328.558	190.456	337.522	260.618	267.943	307.907	289.656	214.004	281.507	261.997	264.457	257.449	267.538	249.384
2100	287.87	332.078	247.94	274.332	282.802	271.927	288.506	331.096	200.495	339.449	273.1	268.623	317.859	306.696	224.857	279.274	281.564	286.651	260.198	268.842	256.544
2400	293.546	337.052	253.59	283.306	288.561	284.493	293.873	335.423	207.349	345.633	284.417	272.846	321.996	321.931	236.408	274.382	292.513	302.682	262.679	269.979	263.336
2700	298.191	342.659	257.571	289.601	296.678	290.281	294.209	339.944	215.784	350.156	288.521	278.616	334.947	337.986	244.272	272.846	299.238	311.14	268.804	272.671	265.784
3000	304.201	348.703	266.162	297.072	302.961	292.079	297.66	343.413	217.37	358.451	295.652	280.804	337.989	349.817	250.741	272.974	308.414	321.748	276.063	276.162	267.815
3300	310.537	350.407	269.585	301.815	303.799	294.728	299.721	345.549	225.24	362.058	300.809	281.546	339.433	356.674	255.748	276.774	315.288	327.469	282.129	278.508	275.41
3600	316.836	360.965	274.599	306.217	308.093	296.686	299.03	349.566	231.238	366.823	305.896	284.654	345.165	365.365	256.791	278.509	320.684	332.161	287.99	283.415	274.543
3900	319.227	365.496	278.216	312.476	311.536	300.702	297.443	353.55	236.252	368.38	311.179	288.331	348.616	370.949	258.884	283.113	329.666	336.429	288.979	285.253	281.176
4200	320.367	367.649	279.326	319.214	315.892	299.625	295.206	357.944	241.065	371.911	314.43	290.913	353.243	374.021	259.611	286.187	333.221	339.122	295.685	283.193	285.459
4500	324.488	376.091	278.296	325.256	319.272	301.424	299.215	360.617	245.871	375.601	319.632	295.705	355.451	378.966	262.113	288.702	335.504	341.373	299.374	286.623	288.091
4800	328.64	379.089	284.245	326.872	322.681	308.291	299.53	362.831	252.387	380.313	323.779	299.49	360.454	380.387	261.621	291.309	339.599	344.923	301.08	288.814	293.888
5100	329.878	385.211	290.109	331.028	326.534	310.641	297.889	366.282	256.012	380.033	327.293	303.198	366.8	381.317	262.642	292.47	345.824	346.534	295.63	289.579	298.93
5400	331.413	389.976	293.256	336.925	329.764	313.7	300.035	368.681	256.588	381.687	330.062	305.373	370.721	379.468	266.092	296.196	349.958	344.678	298.849	291.922	299.73
5700	332.792	392.906	296.892	339.588	333.954	316.449	301.116	370.274	261.804	383.928	332.946	309.183	373.99	374.815	266.843	301.572	349.989	348.099	301.15	292.285	297.74
6000	335.267	396.465	300.478	342.463	337.852	318.147	301.751	372.482	265.331	387.423	335.443	311.643	377.201	378.452	269.633	301.705	350.681	346.797	304.072	296.665	298.371
6300	339.783	400.275	306.9	346.24	341.79	320.962	303.892	375.222	267.38	389.472	337.985	315.607	381.035	382.357	270.811	305.119	350.66	352.463	307.752	298.56	302.35
6600	342.881	405.066	309.01	348.76	345.799	324.234	305.168	376.682	270.417	392.024	340.67	319.015	382.949	384.131	271.049	308.911	353.389	360.165	306.338	300.007	302.048
6900	348.229	408.009	309.355	351.785	348.12	326.986	308.032	377.338	274.969	396.51	342.888	322.065	385.163	383.546	275.864	311.144	353.644	363.359	307.918	302.317	304.927
7200	349.763	411.821	313.817	355.633	351.864	327.585	310.38	379.556	277.977	399.637	344.449	324.306	387.711	385.584	279.758	314.136	353.728	368.956	308.247	305.363	304.492
7500	351.811	415.041	316.088	356.807	354.914	329.352	312.719	381.232	280.403	402.174	347.255	327.026	390.109	387.304	281.893	315.859	356.299	370.803	309.567	306.615	305.055
7800	353.219	419.521	318.534	359.585	358.249	331.068	315.641	382.929	281.013	405.055	349.85	329.615	391.816	389.62	284.558	319.076	358.186	370.181	311.028	307.936	304.953
8100	356.434	423.621	323.827	361.115	361.801	332.878	317.84	384.663	284.592	406.278	352.589	332.941	394.548	391.19	285.846	322.626	360.509	372.478	312.788	309.844	306.853
8400	358.835	425.993	326.034	363.371	364.52	335.5	318.798	386.162	288.609	408.505	354.291	334.878	396.986	392.562	290.147	324.359	363.752	375.793	314.859	313.043	307.396
8700	362.025	428.736	327.654	364.98	366.66	337.349	320.527	387.799	292.054	411.692	355.32	337.042	399.206	395.218	294.092	327.264	364.107	376.787	316.596	313.918	309.753
9000	365.069	430.746	329.713	367.761	369.545	338.996	321.229	390.236	293.117	414.32	356.768	339.143	400.48	396.487	300.028	329.28	366.28	375.856	319.303	315.869	311.176
9300	367.926	432.051	331.308	369.05	372.107	340.319	322.432	392.009	296.837	417.251	357.937	341.654	402.102	399.368	301.34	331.574	368.895	378.673	320.889	318.298	312.473
9600	371.196	433.095	334.87	370.469	374.518	341.642	323.589	393.953	298.548	420.476	360.259	343.943	402.777	400.829	304.841	334.82	370.887	381.459	322.142	321.237	313.338
9900	372.896	436.949	335.572	372.278	377.816	343.836	324.643	395.32	300.495	421.746	362.165	346.007	404.536	402.693	307.141	336.59	371.954	381.846	323.667	323.491	315.28
10200	375.806	438.638	336.663	373.549	379.511	345.577	326.148	396.654	304.471	423.619	364.014	347.874	406.009	404.778	310.387	338.694	373.432	382.924	325.376	326.824	315.99
10500	376.665	440.899	337.986	375.927	382.12	347.094	327.933	397.97	307.506	425.898	366.065	349.676	406.873	406.536	312.401	341.499	375.175	381.97	326.439	327.968	316.257
10800	377.848	442.243	339.152	377.765	384.6	348.83	329.249	399.295	309.553	427.871	367.03	351.061	408.096	408.615	313.737	342.716	376.54	383.603	327.895	330.271	317.304
11100	380.056	442.833	340.612	379.082	387.248	350.37	330.012	400.666	308.135	429.933	368.409	352.659	409.162	410.416	312.587	344.924	377.879	384.574	329.716	334.34	319.094
11400	382.697	446.379	340.917	380.851	389.173	352.313	331.506	402.646	309.399	431.85	369.858	353.892	411.179	412.743	317.635	346.63	378.494	385.424	330.571	335.79	320.184
11700	385.09	448.216	342.643	383.097	392.057	353.39	332.856	404.56	311.15	434.062	371.351	354.58	412.201	414.536	317.688	349.974	380.069	387.639	332.211	337.531	322.171
12000	386.375	450.091	344.747	384.615	394.777	354.527	333.91	405.536	315.726	436.032	372.744	355.924	413.034	415.448	320.658	352.922	381.859	386.412	333.646	339.249	323.264
12300	387.966	452.47	346.301	386.249	395.097	355.955	334.555	406.736	315.953	437.602	373.853	357.339	414.888	417.163	321.11	354.24	383.325	387.276	335.192	340.295	324.154
12600	389.562	452.627	347.782	387.711	396.021	356.581	336.074	408.586	317.183	439.496	374.756	358.91	415.947	418.893	325.244	356.42	384.79	389.314	336.167	343.307	325.697
12900	390.884	454.985	348.923	389.317	398.236	357.475	336.662	410.103	321.455	441.58	375.797	359.697	417.533	421.239	326.481	357.699	385.332	390.866	337.772	344.656	327.381
13200	392.967	456.651	349.648	390.789	400.512	358.503	337.599	411.371	322.705	444.599	377.304	361.238	418.599	422.781	326.189	358.485	387.007	390.91	339.118	345.837	328.073
13500	394.229	457.309	351.186	392.532	401.868	359.255	338.717	412.453	323.574	446.358	378.331	362.595	420.102	424.32	327.008	360.855	387.773	391.062	340.704	347.315	329.979
13800	395.221	458.775	351.39	394.27	404.431	360.682	340.098	414.063	325.154	447.796	379.474	363.618	421.527	426.076	328.263	363.135	389.244	391.889	342.049	348.88	330.747
14100	397.151	460.79	352.682	395.815	405.727	362.111	341.336	415.007	325.683	449.195	380.246	364.912	422.748	427.058	329.596	364.33	390.022	392.456	343.746	351.051	331.832
14400	398.509	461.31	353.236	396.283	407.846	363.054	342.953	416.479	330.167	450.762	381.809	366.109	423.628	427.782	332.351	366.253	390.524	393.712	345.437	353.121	332.612
14700	399.908	462.068	355.005	397.291	409.973	363.863	344.298	417.261	332.158	451.842	382.463	366.66	424.406	428.405	333.438	368.378	391.822	394.57	346.665	354.208	332.931
15000	401.793	463.922	356.026	399.055	410.78	363.973	345.386	418.539	337.067	453.101	383.141	367.427	426.224	429.806	335.158	369.796	392.927	395.583	347.761	356.191	333.799
15300	402.428	465.514	356.845	400.339	411.63	365.707	346.194	419.274	339.231	454.283	384.057	368.393	426.596	431.248	335.886	370.661	394.326	396.978	348.893	357.811	334.928
15600	404.267	465.409	357.93	401.404	413.778	366.587	346.674	420.13	342.047	455.877	385.082	369.149	427.423	432.71	337.075	371.924	394.928	398.125	350.081	358.815	335.103
15900	405.438	466.649	358.145	402.341	414.622	367.504	347.004	421.656	343.022	458.102	386.076	370.508	428.488	434.386	336.652	372.979	396.213	398.425	351.786	360.492	336.35
16200	406.266	467.537	358.833	402.678	416.34	368.641	348.375	422.665	343.896	459.153	387.056	371.277	429.54	435.059	337.983	374.016	396.802	399.964	352.951	362.311	337.26
16500	407.932	468.266	359.829	403.41	417.116	369.831	349.297	423.601	344.171	461.028	388.43	372.297	430.708	436.777	338.889	375.135	398.191	401.38	354.08	363.705	337.468
16800	407.941	469.598	360.401	404.556	418.598	371.142	350.157	424.483	347.242	463.254	389.394	372.363	431.722	437.648	339.519	377.679	399.197	402.143	355.334	365.035	338.43
17100	409.37	470.392	361.307	405.908	420.562	371.827	351.801	425.432	348.573	464.752	390.629	373.678	431.9	438.962	340.555	378.035	399.751	402.919	357.098	367.07	339.205
17400	411.041	471.181	362.242	406.633	421.083	372.79	352.727	426.522	350.645	465.861	391.43	373.944	432.631	440.278	343.203	378.712	399.877	403.668	358.054	367.855	340.259
17700	411.996	471.992	362.96	407.824	421.965	373.51	353.448	427.544	351.198	467.217	392.266	374.266	433.875	441.397	343.203	380.056	400.576	404.195	358.783	369.039	341.322
18000	412.254	472.103	363.691	408.852	422.859	374.272	354.759	428.41	353.069	468.724	392.886	374.881	435.029	442.772	344.095	381.222	401.441	404.683	359.896	371.05	341.81
18300	412.816	472.608	364.176	409.591	423.87	375.794	355.845	429.099	353.752	470.007	393.881	375.534	435.855	443.867	345.266	381.54	402.072	405.437	360.976	371.753	342.25
18600	413.452	473.101	364.793	410.598	425.318	376.612	356.416	430.057	356.249	471.623	394.371	376.114	436.979	445.025	346.769	382.717	402.206	406.127	362.41	373.487	342.803
18900	413.727	474.294	365.826	411.67	426.99	377.299	357.02	431.365	357.158	473.033	395.517	376.939	438.082	446.454	348.195	383.462	402.379	406.176	363.908	374.96	344.185
19200	414.079	475.644	366.588	412.617	427.591	378.488	358.018	432.296	358.023	473.976	396.556	377.665	438.475	447.489	349.23	384.93	402.365	407.478	364.899	376.935	344.458
19500	414.697	477.049	367.101	412.914	428.615	378.888	358.457	433.672	358.407	474.936	397.55	379.199	439.037	449.015	350.83	386.373	402.672	408.233	366.073	377.772	345.21
19800	415.214	477.697	368.007	413.724	429.735	379.548	359.507	434.917	360.608	475.847	398.411	379.4	439.713	450.308	351.801	387.201	403.11	408.954	366.969	378.731	345.834
20100	415.747	478.292	368.014	414.855	430.698	380.563	360.423	435.39	360.645	476.508	399.194	380.563	440.493	451.499	352.901	388.157	403.195	409.52	368.052	379.365	346.278
20400	416.012	478.761	368.742	415.699	432.124	381.5	360.905	436.323	361.583	477.366	399.57	381.013	441.353	453.34	353.375	388.99	404.011	410.196	369.016	380.227	346.642
20700	416.9	479.832	369.299	416.478	432.718	382.202	361.482	437.096	361.72	478.918	400.551	381.075	442.493	454.533	354.252	389.619	404.382	410.677	370.353	381.639	347.126
21000	417.907	480.498	370.523	417.947	433.395	382.875	362.259	438.436	363.324	480.025	401.249	381.751	443.632	455.595	355.134	390.383	404.6	410.922	371.638	383.132	347.618
21300	418.314	481.618	371.018	418.468	434.426	383.394	363.034	439.117	364.534	480.38	402.242	382.582	444.621	456.177	356.325	391.305	404.914	411.582	372.016	384.355	348.239
21600	418.632	482.045	371.264	419.299	435.304	383.987	364.17	439.847	367.696	481.329	402.95	383.037	445.403	457.546	357.225	392.878	405.535	412.886	372.414	385.289	348.793
21900	419.123	482.964	372.315	420.021	436.77	384.541	365.116	440.827	368.766	481.886	404.078	384.208	445.97	459.05	358.391	394.022	405.093	413.308	373.169	386.541	349.119
22200	419.78	483.873	373.066	420.592	437.148	385.1	365.398	441.9	369.512	482.506	404.784	384.687	446.934	460.085	358.652	394.618	405.432	413.649	373.824	387.262	350.129
22500	420.25	484.566	373.754	421.024	437.641	385.086	366.357	442.55	371.183	483.568	405.592	385.169	447.29	461.643	359.573	395.223	405.534	414.096	375.01	388.733	351.008
22800	420.663	485.339	374.343	421.918	438.215	385.598	367.015	443.446	372.293	484.548	406.526	385.851	447.827	462.394	360.312	396.162	405.727	414.316	375.551	390.361	351.658
23100	421.076	486.577	374.817	422.512	439.371	386.093	367.718	444.054	372.8	485.425	407.224	385.974	449.213	463.457	361.272	396.664	405.775	415.061	376.448	391.071	351.752
23400	421.964	487.231	375.102	423.213	439.643	386.971	368.414	444.796	374.333	486.199	407.616	386.568	450.14	464.972	362.356	397.294	405.975	415.75	377.475	391.873	351.946
23700	422.431	487.646	375.717	423.843	440.995	386.822	368.961	445.927	375.9	487.016	408.609	387.155	451.175	466.209	363.319	398.35	406.035	415.851	378.065	393.437	352.387
24000	422.833	488.6	376.218	424.244	441.727	387.448	369.386	446.786	379.875	487.592	409.127	388.071	451.861	466.988	364.665	399.18	406.562	416.457	378.654	394.298	352.959
24300	423.359	489.382	376.836	424.975	442.311	387.915	370.156	447.782	378.547	487.889	409.725	388.222	452.295	467.837	365.228	400.203	406.432	416.662	379.451	395.33	352.904
24600	423.493	489.973	377.277	425.84	443.417	387.964	371.227	448.234	381.275	488.62	410.339	388.727	452.816	468.996	365.944	400.795	407.069	416.949	381.013	395.639	353.242
24900	423.807	490.557	377.965	426.632	444.443	388.547	372.436	449.526	383.799	489.133	411.093	389.151	453.718	469.325	367.495	401.553	407.408	417.798	381.908	396.814	353.424
25200	424.378	491.29	378.371	427.413	444.759	388.919	373.282	450.715	386.16	489.464	411.32	389.203	454.432	470.239	368.694	402.294	407.654	418.32	382.76	397.295	353.734
25500	424.895	491.759	378.873	427.995	445.302	389.38	373.878	451.43	387.65	489.751	411.904	390.077	455.393	471.663	369.883	402.537	407.448	418.805	383.283	398.272	354.125
25800	425.508	492.471	379.402	428.721	445.77	389.782	374.225	452.39	387.697	490.79	412.509	390.512	455.832	473.083	371.063	403.532	407.492	419.214	383.82	398.769	354.326
26100	425.81	492.852	379.484	428.983	446.481	390.32	375.058	453.561	391.657	491.713	412.735	390.662	456.318	473.944	371.976	404.278	407.564	419.97	384.546	399.835	354.601
26400	425.886	493.388	379.445	429.545	447.478	390.968	375.653	454.914	391.151	492.084	413.387	390.707	456.96	474.481	372.629	404.787	407.639	420.918	385.072	400.275	354.618
26467	425.792	493.65	379.575	429.726	447.603	390.849	375.76	455.1	383.453	492.52	413.579	390.818	457.113	474.917	372.801	404.928	407.643	421.077	384.833	400.498	354.653
26467	425.792	493.65	379.575	429.726	447.603	390.849	375.76	455.1	383.453	492.52	413.579	390.818	457.113	474.917	372.801	404.928	407.643	421.077	384.833	400.498	354.653
