# Supplementary material for: Acupuncture Regulating Gut Microbiota in Abdominal Obese Rats Induced by High-Fat Diet
Source: Evid Based Complement Alternat Med. 2019 Jun 2;2019:4958294. doi: 10.1155/2019/4958294 (PMC6582896; doi:10.1155/2019/4958294)
Supplement: Supplementary Materials — (1) LEfSe analysis of each group. (2) Data of principal coordinates analysis (Pcoa) in each sample at the OTU level. (3) Eigen values of Pcoa from PC1-PC21. (4) Statistical data of each group at the genus level. (5) Statistical data of each group at the phylum level. [file 4958294.f1.zip › 4958294.f1/rareficationCurve Table sobs.xls]

## Sheet: 稀释性曲线表
num sample rows	Acu_2	Acu_7	Acu_1	Acu_3	Acu_4	Acu_5	Acu_6	HFD_4	HFD_3	HFD_5	HFD_6	HFD_2	HFD_7	HFD_1	NCD_1	NCD_5	NCD_2	NCD_6	NCD_3	NCD_7	NCD_4
1	1	1	1	1	1	1	1	1	1	1	1	1	1	1	1	1	1	1	1	1	1
300	73.59	74.55	55.01	76.62	80.16	68.63	57.25	103.53	40.76	71.96	80.61	80.53	83.56	74.17	37.51	50.25	45.47	60.03	54.7	44.58	51.33
600	106.13	111.73	80.78	110.94	112.88	98.53	84.27	144.01	63.16	107.82	114.53	111.63	120.98	106.69	58.77	77.82	74.7	89.33	81.7	68.21	78.01
900	128.98	137.65	100.01	134.14	135.44	119.43	103.25	171.03	79.91	133.08	136.93	133.59	146.26	128.88	74.64	98.93	96.43	109.99	102.09	85.66	96.68
1200	145.98	158.3	114.78	152.21	152.87	135.93	119.26	192.02	93.11	153.52	154.11	150.46	165.69	146.7	87.5	115.22	113.88	126.75	117.35	100.12	111.98
1500	159.54	175.01	126.98	166.22	167.33	149.15	132.39	209.53	103.81	170.74	168.38	164.33	182.21	161.57	97.86	128.82	129.11	140.08	130.54	112.97	124.59
1800	171.56	189.36	137.93	178.7	179.09	160.15	143.1	223.44	112.69	185.22	180.19	175.87	196.23	174.45	107.4	140.71	142.45	151.88	141.83	123.59	135.14
2100	182.18	202.34	147.09	189.14	189.78	170.19	153.31	235.81	121.13	198.06	190.58	185.01	207.78	185.36	116.08	150.77	154.84	162.54	151.11	133.37	144.1
2400	191.09	213.73	155.63	198.22	199.3	179.18	162.36	245.62	128.22	209.48	200.22	193.42	218.61	195.57	124.22	159.98	165.3	171.75	159.94	141.82	152.44
2700	199.45	223.69	162.95	206.73	208.35	187.01	170.13	255.51	134.91	219.76	208.32	201.01	228.63	204.76	131.46	167.88	174.5	179.81	168.14	149.9	159.85
3000	207.5	233.48	169.85	214.7	216.07	194.12	177.65	263.67	140.91	229.18	215.96	208.07	237.16	213.18	137.87	174.98	182.81	187.38	175.26	157.06	166.6
3300	214.61	241.93	176.22	221.59	222.65	200.55	184.31	271.05	146.54	237.93	222.86	213.97	244.52	221.06	143.91	181.63	190.89	194.39	181.56	163.63	173.31
3600	220.8	249.75	182.07	227.93	228.86	206.75	190.4	277.97	151.56	245.7	229.09	219.64	251.86	228.51	149.44	188.2	198.27	200.87	188.1	169.69	179.01
3900	226.67	257.33	187.42	234.09	234.54	212.37	195.9	284.35	156.43	252.76	234.86	224.83	258.47	235.28	154.75	194.11	205.18	206.63	193.36	175.42	184.59
4200	232.12	263.89	192.4	239.72	239.98	217.6	201.2	290.1	160.84	258.9	239.74	229.5	264.34	241.13	159.48	199.85	211.45	212.06	198.62	180.53	189.85
4500	237.24	270.4	196.92	245.08	245.05	222.7	206.59	295.06	165.12	265.39	245.04	234.2	269.79	246.85	163.77	204.83	217.12	217.6	203.53	185.41	194.74
4800	242.1	275.9	201.77	250.13	249.95	227.38	211.35	299.92	168.89	271.28	249.75	238.44	275.13	252.29	167.8	209.64	222.76	222.68	208.36	190.21	199.69
5100	246.44	281.46	206.22	254.64	254.31	231.88	215.45	304.47	172.26	276.3	254.14	242.61	280.47	257.38	172.05	213.99	228.43	227.43	212.56	194.61	204.14
5400	250.47	286.56	210.38	259.09	258.34	235.96	219.63	308.61	175.66	281.63	258.22	246.14	285.59	262	176.14	218.41	233.34	232.19	216.67	198.82	208.31
5700	254.45	291.68	214.52	263.44	262.46	240.01	223.6	312.48	178.9	286.34	262.07	249.71	290.35	267.23	179.76	222.58	238.13	236.43	220.78	202.43	211.89
6000	258.25	296.56	218.06	267.37	266.45	243.37	227.36	316.01	182.22	291.44	265.65	252.8	294.83	271.52	183.28	225.98	242.45	240.47	224.49	206.13	215.58
6300	262.2	300.9	221.58	271.39	269.85	246.76	230.74	319.57	185.26	295.71	269.23	256.21	298.94	275.8	186.69	230.01	246.69	244.66	228.41	210.03	219.15
6600	265.95	305.55	224.72	274.93	273.32	250.13	234.19	322.71	188.31	299.77	272.49	259.5	302.64	279.84	189.84	233.51	250.55	248.68	231.45	213.23	222.48
6900	269.53	309.48	227.71	278.35	276.76	253.35	237.7	325.5	191.48	304.11	275.67	262.59	306.24	283.67	193.19	236.69	254.39	252.58	234.54	216.65	225.7
7200	272.56	313.24	231.08	281.79	280.34	256.56	240.92	328.42	194.18	308.11	278.51	265.41	309.89	287.43	196.45	239.91	257.89	256.21	237.55	220.07	228.43
7500	275.43	316.94	234.19	284.73	283.65	259.55	243.92	330.97	196.74	311.96	281.41	268.19	313.2	290.89	199.4	242.75	261.7	259.74	240.36	223.15	231.36
7800	278.3	321.22	237.16	287.56	286.56	262.28	247.15	333.51	199.34	315.59	284.37	270.79	316.35	294.44	202.15	245.99	265.39	262.79	243.22	226.54	233.85
8100	281.29	324.92	240.31	290.37	289.69	264.94	250.08	335.81	202.1	318.73	287.05	273.52	319.81	297.69	204.77	248.89	269.35	266.12	246	229.25	236.67
8400	284	328.17	242.88	293.22	292.61	267.7	252.55	338.16	204.56	321.95	289.37	275.84	323.06	300.8	207.64	251.43	272.61	269.13	248.71	232.28	239.04
8700	286.62	331.43	245.53	295.81	295.11	270.3	255.09	340.59	207.1	325.25	291.61	278.14	325.94	304.13	210.44	254.23	275.7	272.1	251.25	234.73	241.75
9000	289.36	334.45	248.17	298.52	297.61	272.53	257.3	343.22	209.19	328.48	293.89	280.43	328.69	307.19	213.23	256.66	278.81	274.77	254.13	237.41	244.22
9300	292.02	337.26	250.51	300.79	300.28	274.64	259.52	345.38	211.44	331.58	296.21	282.85	331.41	310.71	215.65	259.13	281.86	277.89	256.51	239.99	246.36
9600	294.39	340.36	253.11	303.16	302.6	276.76	261.68	347.49	213.57	334.77	298.65	284.99	333.82	313.37	217.83	261.77	284.86	280.72	258.7	242.33	248.37
9900	296.88	343.49	255.6	305.43	304.86	279.05	263.68	349.35	215.45	337.17	301.07	287.12	336.31	316.07	220.3	264.06	287.36	283.37	260.83	244.84	250.66
10200	299.34	346.25	258.01	307.45	307.28	281.26	265.89	351.27	217.6	339.89	303.41	289.18	338.66	318.36	222.53	266.42	289.86	285.81	262.94	247.37	252.51
10500	301.35	348.98	260.03	309.88	309.54	283.22	268.26	353.04	219.69	342.58	305.57	291.18	340.8	321.04	224.5	268.9	292.66	288.26	264.83	249.61	254.18
10800	303.39	351.6	262.03	312.06	311.88	285.33	270.3	354.82	221.77	345.12	307.3	292.97	343	323.6	226.55	270.98	295.15	290.66	266.61	251.89	256.21
11100	305.58	354.03	263.9	313.96	313.94	287.33	272.06	356.64	223.45	347.62	309.17	294.75	345.1	326.01	228.76	273.03	297.5	292.94	268.68	254.2	258.22
11400	307.86	356.71	265.82	316.05	316.21	289.56	273.98	358.47	225.35	349.99	310.96	296.39	347.46	328.57	230.63	274.97	299.71	294.95	270.51	256.4	259.99
11700	309.8	359.28	267.71	318.23	318.47	291.4	275.81	360.29	227.11	352.46	312.88	297.93	349.5	330.8	232.71	277.4	301.92	296.96	272.52	258.2	262.06
12000	311.68	361.67	269.79	320.2	320.64	293.15	277.51	361.77	229.05	354.76	314.7	299.59	351.4	332.87	234.75	279.44	304.26	299.03	274.46	260.21	263.8
12300	313.66	364.18	271.8	322.09	322.18	294.97	278.96	363.37	230.6	356.85	316.44	301.22	353.34	335.03	236.69	281.26	306.59	301.09	276.21	262.14	265.35
12600	315.48	366.26	273.68	323.76	323.76	296.43	280.94	365.07	232.36	359	317.86	302.84	355.14	337.18	238.58	283.07	308.83	303.2	277.71	264.08	267.1
12900	317.04	368.51	275.29	325.52	325.6	298.04	282.41	366.58	234.24	361.25	319.39	304.26	357.04	339.28	240.28	284.93	310.66	305.41	279.48	265.86	268.92
13200	318.84	370.72	277	327.29	327.51	299.51	283.83	367.96	235.99	363.63	320.97	305.85	358.88	341.27	241.9	286.4	312.78	307.42	281.14	267.77	270.48
13500	320.64	372.56	278.84	329.07	329.09	300.91	285.44	369.33	237.62	365.71	322.44	307.26	360.65	343.25	243.69	288.11	314.57	309.26	282.73	269.53	272.27
13800	322.21	374.75	280.2	330.83	330.87	302.52	287.03	370.8	239.17	367.62	323.94	308.61	362.52	345.34	245.33	290.01	316.69	311.08	284.18	271.23	273.76
14100	323.76	376.92	281.89	332.46	332.44	304.13	288.63	372.02	240.59	369.54	325.31	309.93	364.18	347.06	247.1	291.36	318.52	312.84	285.76	273	275.33
14400	325.43	378.84	283.29	333.87	334.01	305.58	290.28	373.48	242.33	371.39	326.87	311.26	365.8	348.59	248.69	293.09	320.21	314.61	287.33	274.67	276.73
14700	326.99	380.66	284.98	335.38	335.79	307	291.87	374.63	243.92	373.06	328.14	312.52	367.24	350.18	250.34	294.93	322.16	316.24	288.74	276.03	278.05
15000	328.72	382.73	286.33	336.96	337.25	308.15	293.31	376.03	245.4	374.79	329.38	313.7	369.05	351.86	252.12	296.49	323.85	317.89	290.04	277.94	279.48
15300	330.28	384.76	287.77	338.42	338.55	309.79	294.53	377.11	246.94	376.57	330.64	314.92	370.26	353.59	253.64	298.01	325.63	319.56	291.39	279.51	280.84
15600	331.86	386.33	289.3	339.8	340.32	311.1	295.61	378.14	248.5	378.35	331.97	316.16	371.63	355.23	255.23	299.49	327.22	321.12	292.73	281.06	281.93
15900	333.31	388.12	290.61	341.15	341.65	312.35	296.71	379.47	250.04	380.34	333.26	317.52	373.08	357.02	256.65	300.87	328.96	322.55	294.32	282.54	283.19
16200	334.74	389.92	291.9	342.3	343.32	313.6	298.11	380.62	251.38	381.89	334.5	318.72	374.6	358.45	258.14	302.15	330.54	324.18	295.48	284.1	284.46
16500	336.18	391.41	293.31	343.49	344.75	314.83	299.3	381.73	252.78	383.64	335.77	319.95	375.99	360.21	259.54	303.56	332.17	325.9	296.75	285.57	285.39
16800	337.34	393.1	294.6	344.91	346.24	316.06	300.5	382.77	254.27	385.45	336.93	320.89	377.24	361.63	260.84	305.32	333.75	327.44	297.96	287.04	286.58
17100	338.78	394.79	295.84	346.28	347.7	317.15	301.94	383.78	255.57	387.13	338.13	322.08	378.35	363.2	262.19	306.5	335.28	328.91	299.29	288.58	287.71
17400	340.31	396.35	297.05	347.4	348.8	318.43	303.06	384.92	257.11	388.69	339.2	323.03	379.69	364.7	263.62	307.8	336.54	330.33	300.42	289.98	288.92
17700	341.71	397.81	298.08	348.75	349.93	319.55	304.1	385.95	258.26	390.26	340.18	323.97	381.06	366.21	264.82	309.18	337.94	331.75	301.42	291.55	290.09
18000	342.73	399.17	299.26	349.96	351.06	320.68	305.34	386.92	259.68	392.05	341.16	325.04	382.37	367.86	266.18	310.41	339.37	333.04	302.57	293.01	291.15
18300	343.91	400.44	300.4	351.05	352.4	321.94	306.54	387.83	260.93	393.55	342.2	326.07	383.53	369.26	267.47	311.44	340.73	334.41	303.65	294.38	292.15
18600	345.15	401.81	301.49	352.26	353.87	322.97	307.51	388.84	262.13	395.22	343.08	327.11	384.83	370.7	268.85	312.73	341.91	335.78	304.96	295.98	293.17
18900	346.29	403.4	302.68	353.41	355.3	324.02	308.49	389.95	263.46	396.7	344.2	328.23	386.13	372.21	270.12	313.91	342.99	336.85	306.24	297.4	294.42
19200	347.41	404.95	303.79	354.53	356.36	325.25	309.52	390.89	264.65	398.08	345.32	329.31	387.07	373.59	271.3	315.23	343.99	338.35	307.24	298.92	295.29
19500	348.6	406.46	304.89	355.4	357.61	326.24	310.44	391.93	265.84	399.47	346.39	330.56	388.08	375.02	272.62	316.41	345.07	339.63	308.34	300.08	296.3
19800	349.79	407.8	305.99	356.38	358.78	327.24	311.49	392.99	267	400.8	347.34	331.36	389.03	376.45	273.81	317.54	346.16	340.82	309.32	301.21	297.33
20100	350.89	409.1	306.84	357.55	360.02	328.31	312.54	393.74	268.06	402.03	348.36	332.45	390.07	377.78	275.1	318.77	347.19	341.9	310.34	302.48	298.27
20400	351.96	410.2	307.88	358.57	361.39	329.22	313.4	394.65	269.15	403.38	349.21	333.31	391.21	379.27	276.31	319.91	348.47	343.05	311.33	303.64	299.14
20700	353.22	411.64	308.85	359.67	362.39	330.19	314.23	395.57	270.38	405.01	350.29	334.1	392.35	380.48	277.42	320.94	349.59	344.16	312.38	305.01	300.04
21000	354.4	412.86	310.09	360.86	363.39	331.18	315.19	396.57	271.41	406.31	351.22	335	393.51	381.72	278.48	321.94	350.57	345.26	313.52	306.27	300.9
21300	355.31	414.11	311.08	361.86	364.51	332.14	316.04	397.39	272.43	407.49	352.25	335.93	394.56	382.86	279.73	323.07	351.6	346.34	314.44	307.49	301.78
21600	356.25	415.09	311.91	362.89	365.7	333.02	317.13	398.18	273.7	408.84	353.17	336.81	395.58	384.16	280.88	324.38	352.71	347.66	315.28	308.65	302.74
21900	357.33	416.31	313.03	363.83	366.95	333.85	318.09	398.99	274.79	409.95	354.13	337.89	396.53	385.47	282.03	325.46	353.51	348.61	316.13	309.89	303.49
22200	358.37	417.55	314	364.74	367.91	334.67	318.85	399.9	275.83	411.15	354.98	338.75	397.62	386.66	282.98	326.47	354.54	349.48	317.04	310.96	304.47
22500	359.41	418.65	314.93	365.62	368.81	335.36	319.75	400.67	276.95	412.36	355.91	339.57	398.41	387.86	283.99	327.46	355.39	350.48	318.08	312.18	305.46
22800	360.44	419.74	315.87	366.51	369.78	336.15	320.6	401.46	277.85	413.52	356.74	340.46	399.28	388.89	284.97	328.59	356.26	351.41	318.87	313.5	306.39
23100	361.41	420.96	316.75	367.28	371.01	337.02	321.44	402.12	279	414.77	357.54	341.11	400.43	390.1	286.04	329.41	357.14	352.49	319.81	314.58	307.17
23400	362.44	421.98	317.46	368.19	371.88	337.92	322.28	402.89	279.91	415.96	358.22	341.98	401.27	391.3	287.01	330.42	357.96	353.62	320.82	315.6	307.86
23700	363.35	422.86	318.44	369.18	373.11	338.53	323.02	403.77	280.79	417.09	359.1	342.78	402.35	392.46	288.02	331.47	358.78	354.55	321.7	316.93	308.73
24000	364.29	424.05	319.32	370.04	374.13	339.4	323.56	404.51	281.8	418.1	359.94	343.63	403.27	393.48	289.24	332.57	359.72	355.44	322.42	317.97	309.57
24300	365.14	425.15	320.19	370.82	375.16	340.21	324.4	405.31	282.77	419.21	360.72	344.32	404.06	394.46	290.06	333.63	360.41	356.36	323.29	319.07	310.14
24600	366.03	426.15	321.05	371.71	376.25	340.77	325.36	405.95	283.81	420.3	361.4	345.05	404.82	395.62	290.93	334.49	361.43	357.19	324.44	319.95	310.83
24900	366.86	427.19	321.88	372.6	377.38	341.49	326.27	406.85	284.73	421.45	362.23	345.67	405.81	396.42	292.09	335.39	362.34	358.2	325.27	320.97	311.53
25200	367.75	428.14	322.68	373.51	378.2	342.1	327.1	407.67	285.71	422.54	362.85	346.21	406.64	397.37	293.1	336.34	363.08	359.17	326.05	321.87	312.18
25500	368.56	429.07	323.57	374.34	379.1	342.8	327.81	408.34	286.7	423.55	363.58	347.04	407.63	398.7	294.08	337.04	363.66	360.04	326.75	322.92	312.95
25800	369.41	429.94	324.42	375.17	380.02	343.43	328.4	409.07	287.62	424.6	364.41	347.68	408.32	399.86	295.07	338.03	364.42	360.94	327.49	323.9	313.58
26100	370.25	430.78	325.08	375.94	380.89	344.15	329.15	409.91	288.74	425.75	365.1	348.31	409.13	400.86	296.04	338.99	365.11	361.84	328.23	324.93	314.31
26400	370.92	431.72	325.8	376.82	381.84	344.92	329.87	410.83	289.75	426.66	365.82	348.85	409.81	401.71	296.83	339.81	365.82	362.76	328.92	325.76	314.86
26467	371	432	326	377	382	345	330	411	290	427	366	349	410	402	297	340	366	363	329	326	315
26467	371	432	326	377	382	345	330	411	290	427	366	349	410	402	297	340	366	363	329	326	315
