# Supplementary material for: Acupuncture Regulating Gut Microbiota in Abdominal Obese Rats Induced by High-Fat Diet
Source: Evid Based Complement Alternat Med. 2019 Jun 2;2019:4958294. doi: 10.1155/2019/4958294 (PMC6582896; doi:10.1155/2019/4958294)
Supplement: Supplementary Materials — (1) LEfSe analysis of each group. (2) Data of principal coordinates analysis (Pcoa) in each sample at the OTU level. (3) Eigen values of Pcoa from PC1-PC21. (4) Statistical data of each group at the genus level. (5) Statistical data of each group at the phylum level. [file 4958294.f1.zip › 4958294.f1/sample information.xls]

## Sheet: 样本信息统计表
Sample\Info	Seq_num	Base_num	Mean_length	Min_length	Max_length
Acu_2	45220	19651292	434.571	341	453
NCD_1	45972	20330525	442.237	298	452
HFD_4	47703	20663839	433.177	283	452
Acu_7	43010	18846307	438.184	358	452
HFD_3	67138	29894695	445.272	267	499
Acu_1	39619	17346920	437.843	420	458
HFD_5	38708	17025401	439.842	325	452
Acu_3	44501	19419605	436.386	339	452
NCD_5	41772	18479579	442.392	292	476
HFD_6	41414	17912636	432.526	305	451
NCD_2	62604	27680479	442.152	358	461
NCD_6	38468	16930329	440.115	298	471
NCD_3	39019	17196420	440.719	358	451
Acu_4	39441	17233969	436.956	291	453
Acu_5	39235	17256202	439.817	358	452
NCD_7	46596	20603913	442.182	294	467
HFD_2	37721	16403640	434.868	298	452
HFD_7	66247	28818779	435.02	298	510
HFD_1	42382	18606203	439.012	358	458
NCD_4	33316	14702545	441.306	360	451
Acu_6	41730	18255596	437.469	389	452
